# Supplementary material
Source: Research Square preprint supplement (doi:10.21203/rs.3.rs-9121799/v1)
Supplement: Supplementary file 1 [file b59e38142c3b547eee46ac57.xlsx]

## Sheet: Sheet1
Lesson	Date	Active Students	Total Interaction Score	Lesson Index
2025-12-15 00:51 自动保存课程 - 2025-12-15	2025-12-15	8	755	1
2025-12-19 07:05 自动保存课程 - 2025-12-19	2025-12-19	1	80	2
2025-12-24 07:37 自动保存课程 - 2025-12-24	2025-12-24	1	60	3
2025-12-24 08:09 自动保存课程 - 2025-12-24	2025-12-24	0	0	4
2025-12-24 08:13 自动保存课程 - 2025-12-24	2025-12-24	0	0	5
2025-12-25 13:15 自动保存课程 - 2025-12-25	2025-12-25	3	240	6
2025-12-25 13:34 物理作业练习册 熊允君作业非常好，曾逸作	2025-12-25	7	700	7
2025-12-25 13:48 自动保存课程 - 2025-12-25	2025-12-25	19	1190	8
2025-12-25 17:37 自动保存课程 - 2025-12-25	2025-12-25	18	1400	9
2025-12-25 18:43 自动保存课程 - 2025-12-25	2025-12-25	9	710	10
2025-12-26 01:20 自动保存课程 - 2025-12-26	2025-12-26	3	210	11
2025-12-26 06:37 自动保存课程 - 2025-12-26	2025-12-26	6	420	12
2026-01-07 20:49 2026年物理作业 学科：物理 年级：高	2026-01-07	20	1785	13
2026-01-08 08:33 课堂录制_20260108_1633 但	2026-01-08	1	95	14
2026-01-09 06:39 课堂录制_20260109_1438 不	2026-01-09	8	526	15
2026-01-12 03:04 物理磁场专题课 学科：物理 年级：高二	2026-01-12	45	2785	16
2026-01-12 06:38 课堂录制_20260112_1437 林	2026-01-12	7	495	17
2026-01-12 20:18 2026高二十班1月12日物理作业 学科	2026-01-12	58	4370	18
2026-01-15 07:34 磁感应强度磁通量 不要说话啊，东方给你弄	2026-01-15	10	720	19
2026-01-15 08:20 高二10班物理课 不要说话了啊，我们为了	2026-01-15	11	850	20
2026-01-16 01:15 电路习题库 啊。如果我们有。好。那么我们	2026-01-16	8	630	21
2026-01-16 02:14 高二12班磁场习题课 下面，下面，下面。	2026-01-16	1	0	22
2026-01-19 06:40 必修二电磁感应安培力 呃，那么这个呢，就	2026-01-19	23	1650	23
2026-01-19 10:03 课堂录制_20260119_1803 但	2026-01-19	1	90	24
2026-01-19 14:19 2026年1月19日物理作业 学科：物理	2026-01-19	18	1500	25
