# Supplementary material
Source: Research Square preprint supplement (doi:10.21203/rs.3.rs-9121799/v1)
Supplement: Supplementary file 2 [file d2ca9d708de3953cb0255a03.xlsx]

## Sheet: Fig1_Comparison_Data
Class	Name	Group	Progress	Midterm_Score	Final_Score
高二年级数理10班	student158	Experimental Group	-7	95	88
高二年级数理10班	student180	Experimental Group	-36	86	50
高二年级数理10班	student154	Experimental Group	15	82	97
高二年级数理10班	student068	Experimental Group	12	78	90
高二年级数理10班	student147	Experimental Group	7	77	84
高二年级数理10班	student178	Experimental Group	0	76	76
高二年级数理10班	student176	Experimental Group	-16	72	56
高二年级数理10班	student105	Experimental Group	10	72	82
高二年级数理10班	student019	Experimental Group	16	68	84
高二年级数理10班	student137	Experimental Group	9	67	76
高二年级数理10班	student040	Experimental Group	-3	67	64
高二年级数理10班	student172	Experimental Group	11	66	77
高二年级数理10班	student085	Experimental Group	16	65	81
高二年级数理10班	student049	Experimental Group	-2	61	59
高二年级数理10班	student013	Experimental Group	13	61	74
高二年级数理10班	student082	Experimental Group	-5	61	56
高二年级数理10班	student119	Experimental Group	10	59	69
高二年级数理10班	student186	Experimental Group	-9	59	50
高二年级数理10班	student138	Experimental Group	8	59	67
高二年级数理10班	student003	Experimental Group	4	58	62
高二年级数理10班	student063	Experimental Group	11	57	68
高二年级数理10班	student161	Experimental Group	1	56	57
高二年级数理10班	student028	Experimental Group	18	56	74
高二年级数理10班	student070	Experimental Group	-7	53	46
高二年级数理10班	student047	Experimental Group	9	53	62
高二年级数理10班	student091	Experimental Group	7	51	58
高二年级数理10班	student056	Experimental Group	2	51	53
高二年级数理10班	student009	Experimental Group	3	50	53
高二年级数理10班	student146	Experimental Group	-10	49	39
高二年级数理10班	student053	Experimental Group	4	49	53
高二年级数理10班	student034	Experimental Group	-7	49	42
高二年级数理10班	student120	Experimental Group	-1	48	47
高二年级数理10班	student179	Experimental Group	-8	47	39
高二年级数理10班	student144	Experimental Group	-8	45	37
高二年级数理10班	student031	Experimental Group	-16	43	27
高二年级数理10班	student171	Experimental Group	14	40	54
高二年级数理10班	student143	Experimental Group	22	40	62
高二年级数理10班	student183	Experimental Group	7	39	46
高二年级数理10班	student124	Experimental Group	14	38	52
高二年级数理10班	student166	Experimental Group	-9	38	29
高二年级数理10班	student033	Experimental Group	1	36	37
高二年级数理10班	student008	Experimental Group	15	33	48
高二年级数理10班	student156	Experimental Group	17	31	48
高二年级数理10班	student148	Experimental Group	8	30	38
高二年级数理10班	student035	Experimental Group	15	30	45
高二年级数理10班	student150	Experimental Group	17	28	45
高二年级数理10班	student078	Experimental Group	23	20	43
高二年级数理11班	student106	Control Group	-26	90	64
高二年级数理11班	student039	Control Group	-7	89	82
高二年级数理11班	student006	Control Group	2	88	90
高二年级数理11班	student103	Control Group	-7	87	80
高二年级数理11班	student170	Control Group	-6	80	74
高二年级数理11班	student044	Control Group	1	78	79
高二年级数理11班	student026	Control Group	5	78	83
高二年级数理11班	student122	Control Group	-10	77	67
高二年级数理11班	student129	Control Group	-11	77	66
高二年级数理11班	student100	Control Group	-10	75	65
高二年级数理11班	student139	Control Group	4	72	76
高二年级数理11班	student029	Control Group	0	69	69
高二年级数理11班	student097	Control Group	-5	67	62
高二年级数理11班	student159	Control Group	1	67	68
高二年级数理11班	student045	Control Group	0	66	66
高二年级数理11班	student057	Control Group	-2	62	60
高二年级数理11班	student107	Control Group	-4	61	57
高二年级数理11班	student089	Control Group	-7	58	51
高二年级数理11班	student185	Control Group	-15	57	42
高二年级数理11班	student087	Control Group	-4	55	51
高二年级数理11班	student123	Control Group	4	55	59
高二年级数理11班	student024	Control Group	20	53	73
高二年级数理11班	student113	Control Group	-13	50	37
高二年级数理11班	student074	Control Group	-8	49	41
高二年级数理11班	student111	Control Group	15	48	63
高二年级数理11班	student155	Control Group	8	45	53
高二年级数理11班	student162	Control Group	-21	44	23
高二年级数理11班	student030	Control Group	-16	41	25
高二年级数理11班	student081	Control Group	1	41	42
高二年级数理11班	student168	Control Group	3	41	44
高二年级数理11班	student067	Control Group	-11	41	30
高二年级数理11班	student112	Control Group	7	41	48
高二年级数理11班	student051	Control Group	-15	40	25
高二年级数理11班	student165	Control Group	-3	39	36
高二年级数理11班	student093	Control Group	0	38	38
高二年级数理11班	student118	Control Group	2	37	39
高二年级数理11班	student042	Control Group	23	37	60
高二年级数理11班	student132	Control Group	-3	36	33
高二年级数理11班	student062	Control Group	17	35	52
高二年级数理11班	student054	Control Group	-10	32	22
高二年级数理11班	student157	Control Group	26	31	57
高二年级数理11班	student115	Control Group	-11	30	19
高二年级数理11班	student126	Control Group	-6	29	23
高二年级数理11班	student133	Control Group	-3	22	19
高二年级数理11班	student022	Control Group	13	20	33
高二年级数理11班	student140	Control Group	5	18	23
高二年级数理11班	student041	Control Group	26	14	40

## Sheet: Fig2_Correlation_Data
Name	Classroom_Total_Score	Progress
student078	180	23
student143	80	22
student028	80	18
student156	80	17
student150	80	17
student085	176	16
student019	102	16
student035	80	15
student008	80	15
student154	70	15
student171	88	14
student124	80	14
student013	265	13
student068	160	12
student063	80	11
student172	80	11
student105	94	10
student119	80	10
student047	80	9
student137	160	9
student148	80	8
student138	80	8
student147	70	7
student183	236	7
student091	70	7
student053	120	4
student003	263	4
student009	80	3
student056	138	2
student161	96	1
student033	80	1
student178	80	0
student049	80	-2
student040	70	-3
student082	80	-5
student070	70	-7
student034	80	-7
student179	80	-8
student166	70	-9
student176	80	-16
student031	80	-16
student180	70	-36

## Sheet: Table1_Summary_Stats
Group	count	mean	std	min	max
Control Group	47	-1.08511	11.5624	-26	26
Experimental Group	47	4.14894	11.7102	-36	23
